# Supplementary material for: Daily activity during stability and exacerbation of chronic obstructive pulmonary disease
Source: PubMed Central journal article supplement (PMC4057595; doi:10.1186/1471-2466-14-98), 2014-06-02
Supplement: 1471-2466-14-98-S1.pdf [file 1471-2466-14-98-S1.pdf]

**Additional table (file 1): Characteristics of the 37 COPD patients in whom pedometry data was recorded during at least one exacerbation**

|                                      | <b>Mean</b>   | <b>(<math>\pm</math>SD)</b> |
|--------------------------------------|---------------|-----------------------------|
| <b>Age (years)</b>                   | 70.4          | ( $\pm$ 7.9)                |
| <b>FEV<sub>1</sub> (l)</b>           | 1.4           | ( $\pm$ 0.5)                |
| <b>FEV<sub>1</sub> (% predicted)</b> | 52.1          | ( $\pm$ 15.7)               |
| <b>FVC (l)</b>                       | 3.0           | ( $\pm$ 0.8)                |
| <b>FEV<sub>1</sub>/FVC (%)</b>       | 46.2          | ( $\pm$ 13.3)               |
| <b>BMI (kg/m<sup>2</sup>)</b>        | 27.3          | ( $\pm$ 6.0)                |
|                                      | <b>Median</b> | <b>( IQR)</b>               |
| <b>Exacerbations per year</b>        | 3             | (1-3)                       |
|                                      | <b>%</b>      |                             |
| <b>Sex (Males)</b>                   | 78.4          |                             |
| <b>Smoking at recruitment</b>        | 32.4          |                             |
